# Supplementary material for: Differential effects of metal ions on TCDD-induced cytotoxicity and cytochrome P4501A1 gene expression in a zebrafish liver (ZFL) cell-line
Source: Royal Society of Chemistry journal article supplement (doi:10.1039/c5mt00219b), 2015-11-12
Supplement: c5mt00219b1.pdf [file c5mt00219b1.pdf]

## Differential effects of metal ions on TCDD-induced cytotoxicity and cytochrome P4501A1 gene expression in a zebrafish liver (ZFL) cell-line

Electronic Supplementary Information

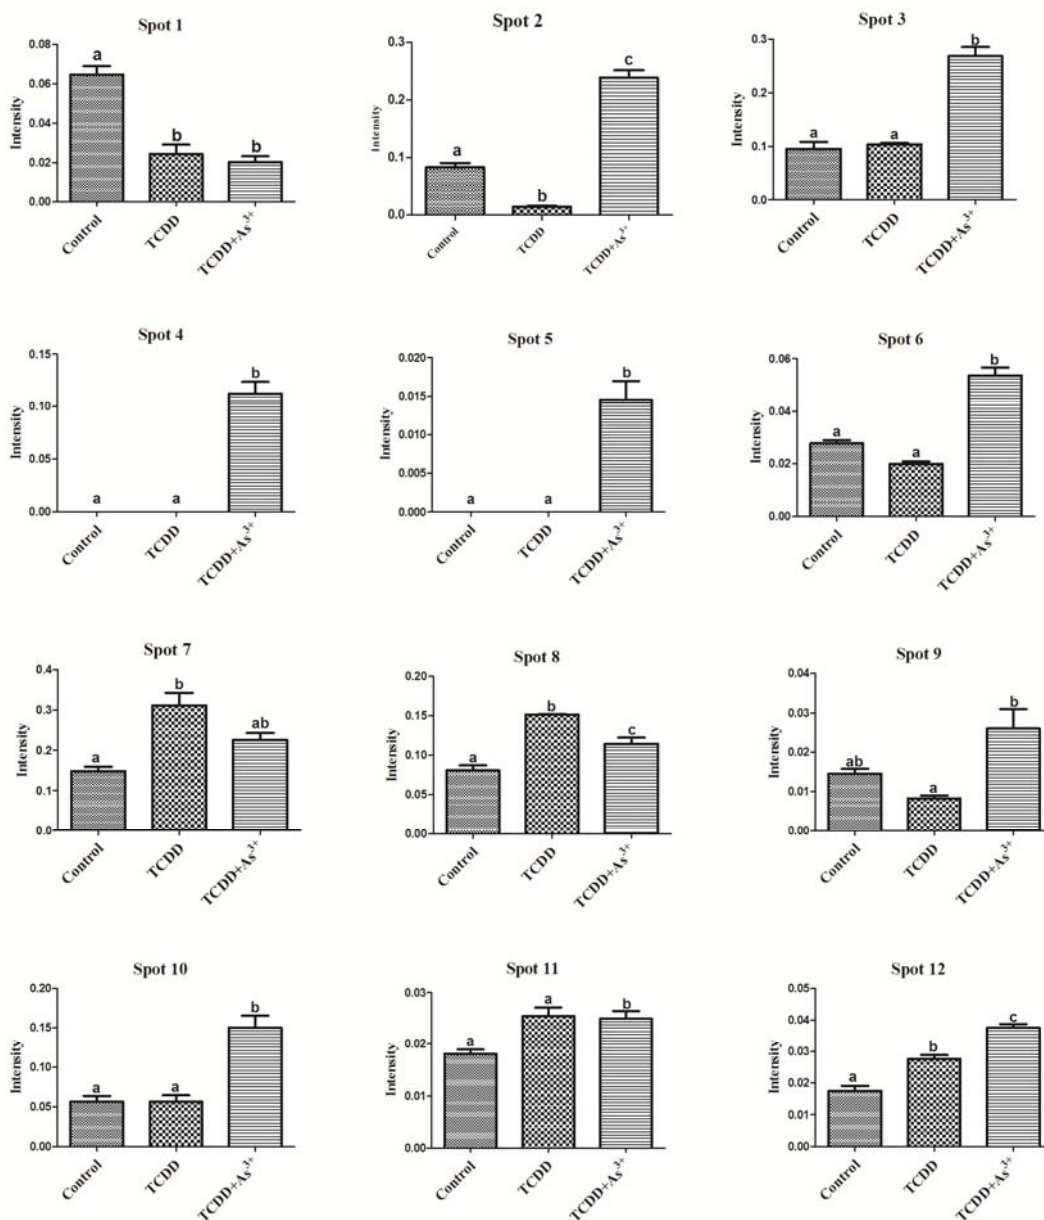

Figure S1-1

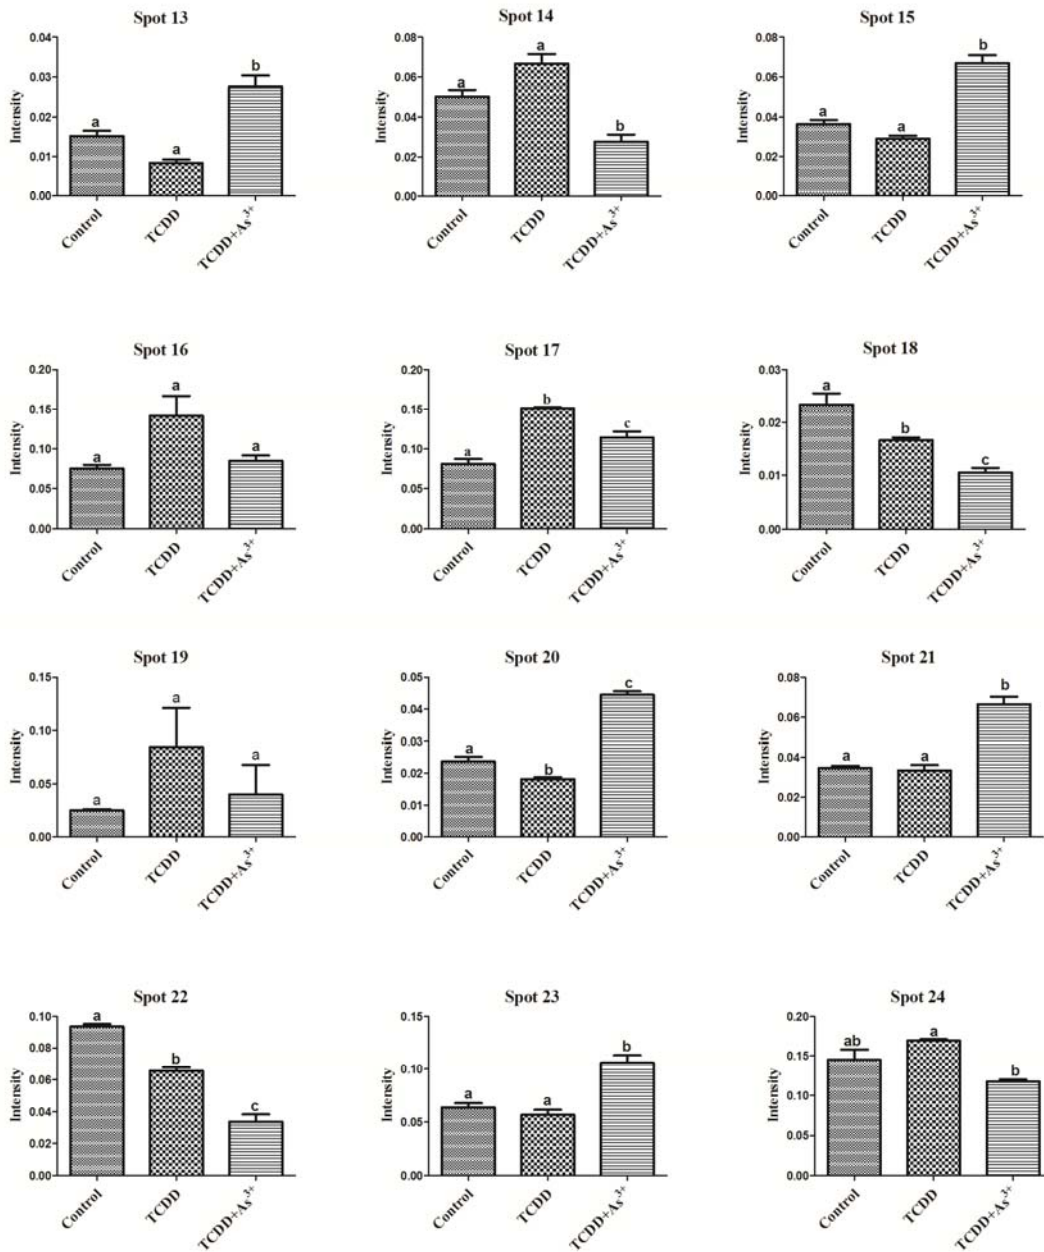

Figure S1-2

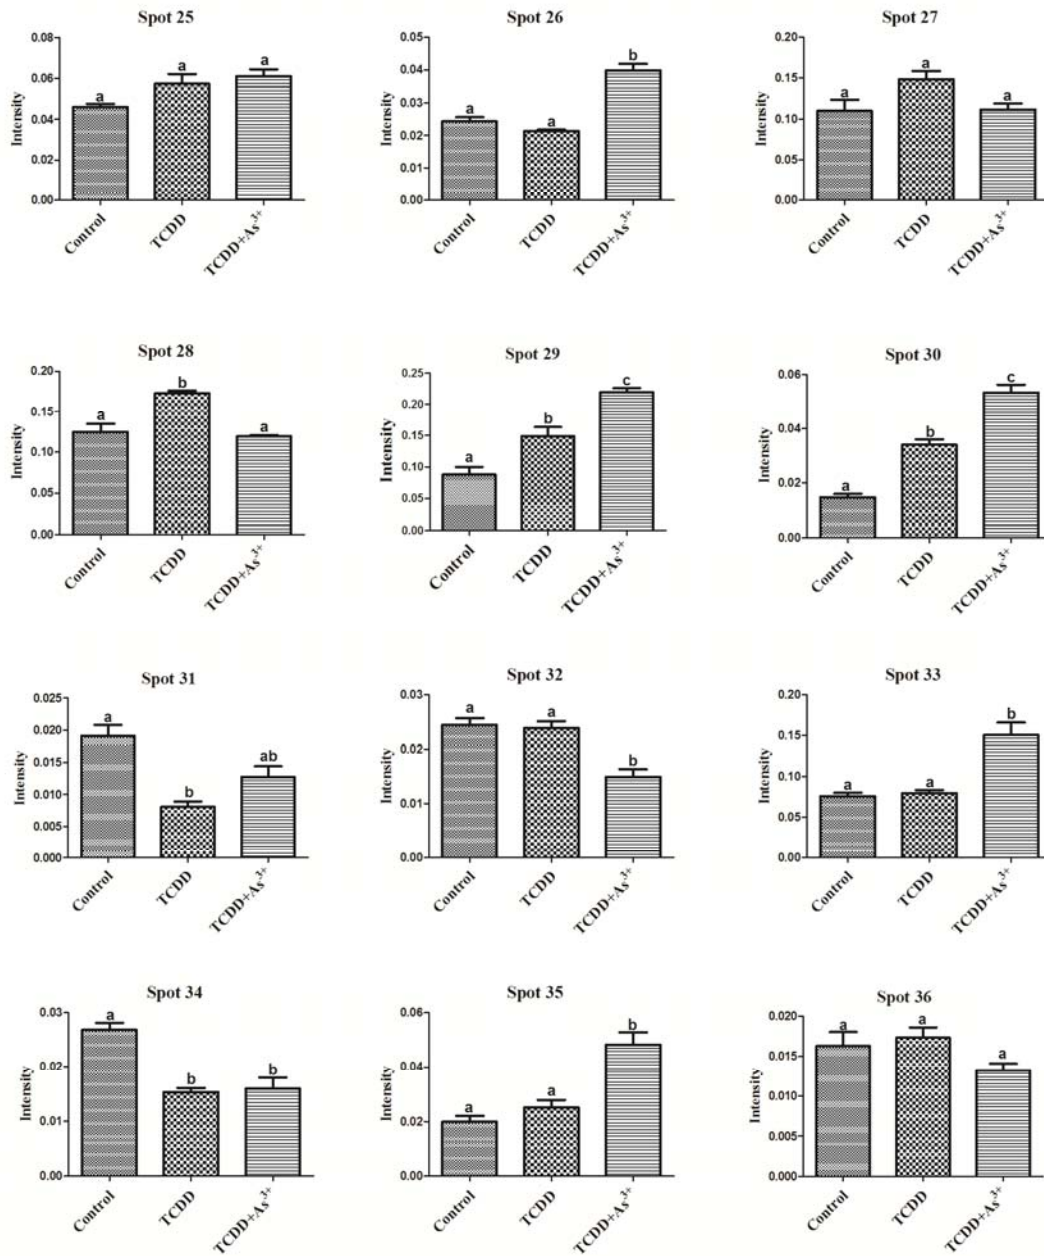

Figure S1-3

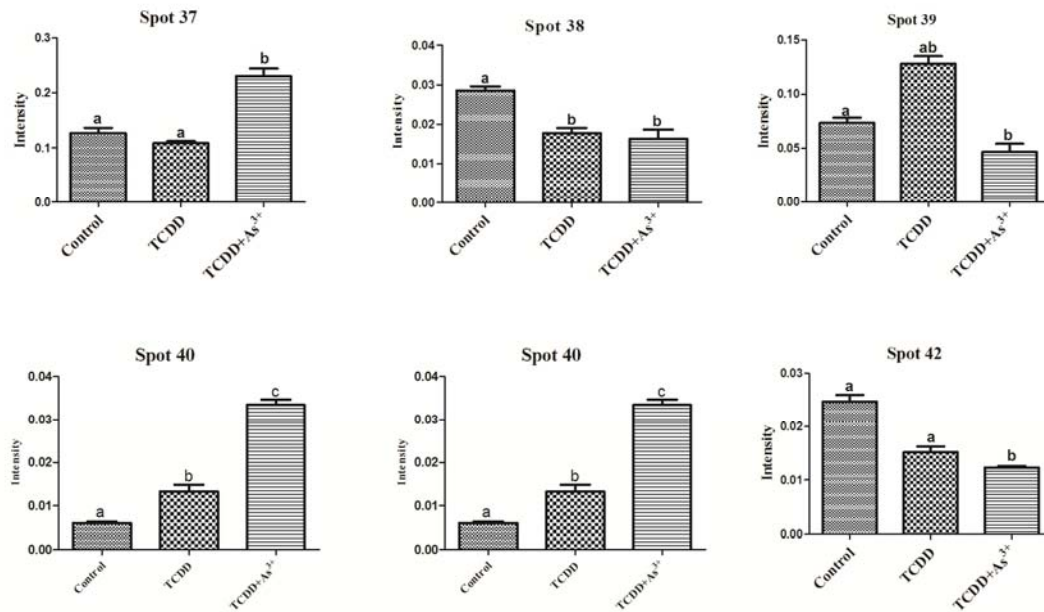

**Figure S1-4**

**Table S1 GO Terms Enrichment Analysis of Gene Clusters of differentially expressed genes**

P-value < 0.1 correspond to enrichment scores larger than 1 (red in table).

| 3 clusters | GO Term                                        | Count | P_Value |
|------------|------------------------------------------------|-------|---------|
|            | glycolysis                                     | 6     | 9.4E-9  |
|            | glucose catabolic process                      | 6     | 2.3E-8  |
|            | hexose catabolic process                       | 6     | 2.3E-8  |
|            | monosaccharide catabolic process               | 6     | 2.3E-8  |
|            | cellular carbohydrate catabolic process        | 6     | 3.7E-8  |
|            | alcohol catabolic process                      | 6     | 3.7E-8  |
|            | glucose metabolic process                      | 6     | 7.3E-8  |
|            | carbohydrate catabolic process                 | 6     | 1.1E-7  |
|            | hexose metabolic process                       | 6     | 2.4E-7  |
|            | monosaccharide metabolic process               | 6     | 3.1E-7  |
|            | generation of precursor metabolites and energy | 6     | 4.2E-6  |

|           |                               |   |        |
|-----------|-------------------------------|---|--------|
| Cluster 2 |                               |   |        |
|           | nucleotide binding            | 4 | 4.5E-1 |
|           | adenyl nucleotide binding     | 4 | 4.5E-1 |
|           | nucleoside binding            |   | 4.5E-1 |
|           | purine nucleotide binding     | 4 | 6.4E-1 |
|           | ATP binding                   | 3 | 6.9E-1 |
|           | adenyl ribonucleotide binding | 3 | 8.4E-1 |
|           | purine ribonucleotide binding | 3 | 8.4E-1 |
|           | ribonucleotide binding        | 3 | 8.4E-1 |
| Cluster 3 |                               |   |        |
|           | metal ion binding             | 4 | 9.4E-1 |
|           | cation binding                | 4 | 9.5E-1 |
|           | ion binding                   | 4 | 9.5E-1 |

**Table S2 Summary of up/down regulated spots number (No)**

| TCDD       | TCCD+ AS <sup>3+</sup> | Spots no |
|------------|------------------------|----------|
| up         | -----                  | 20       |
| up         | up                     | 7        |
| up         | down                   | 12       |
| up         | No effects             | 1        |
| down       | -----                  | 16       |
| down       | up                     | 12       |
| down       | up                     | 3        |
| down       | No-effects             | 1        |
| No-effects | up                     | 5        |
| No-effects | down                   | 1        |

Up / down in TCDD treatment alone group represents up-regulation / down –regulation compare with control group.

Up and down in TCCD+ AS<sup>3+</sup> treatment group represents up-regulation/down –regulation compare with TCDD treatment alone group.
